# Supplementary material for: Keggin type mono Ni(ii)-substituted phosphomolybdate: a sustainable, homogeneous and reusable catalyst for Suzuki–Miyaura cross-coupling
Source: Royal Society of Chemistry journal article supplement (doi:10.1039/c3dt51119g), 2013-01-01

# Keggin type mono Ni(II)- substituted phosphomolybdate: a sustainable, homogeneous and reusable catalyst for Suzuki-Miyaura cross-coupling reaction

Soyeb Pathan,<sup>a</sup> and Anjali Patel\*<sup>a</sup>

<sup>a</sup>Polyoxometalates and Catalysis Laboratory, Department of Chemistry, Faculty of Science, The M. S. University of Baroda, Vadodra 390 002, India

[aupatel\\_chem@yahoo.com](mailto:aupatel_chem@yahoo.com)

i)

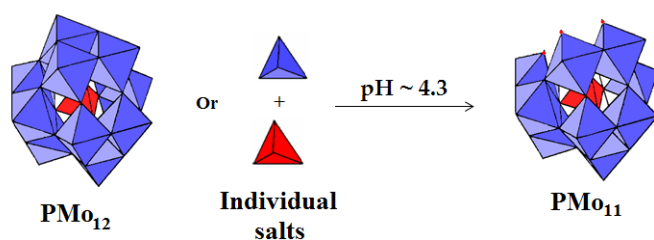

ii)

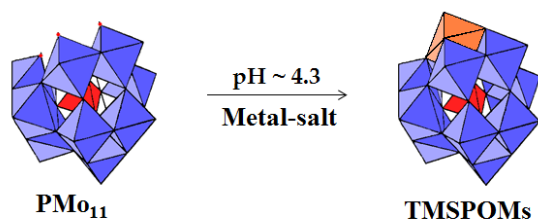

**Scheme S1.** Synthesis transition metal substituted polyoxometalates i) synthesis and isolation of lacunary precursor,  $\text{PMo}_{11}\text{O}_{39}^{7-}$  from either parent 12-molybdophosphoric acid ( $\text{PMo}_{12}$ ) or individual transition metal salts (ii) synthesis of transition metal substituted phosphomolybdate/polyoxometalates by incorporation of transition metal ions into  $\text{PMo}_{11}\text{O}_{39}^{7-}$

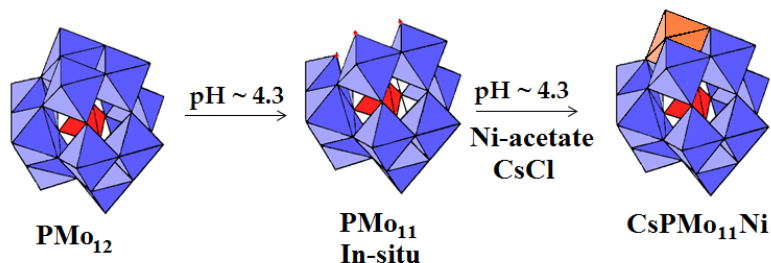

**Scheme S2.** One-pot synthesis of  $\text{CsPMo}_{11}\text{Ni}$

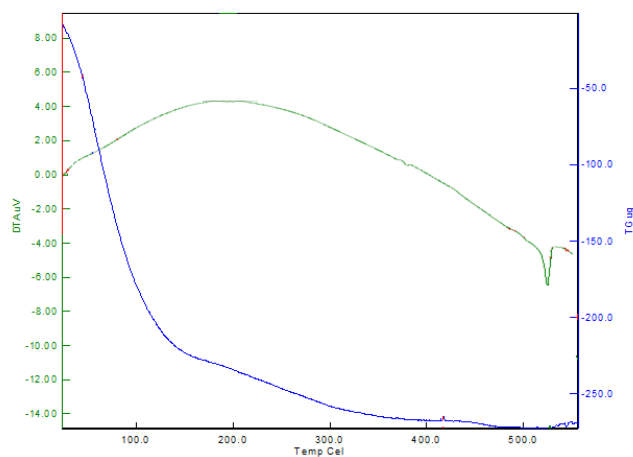

**Fig S1.** TG-DTA curve of CsPMo<sub>11</sub>Ni

### Melting Point, <sup>1</sup>H- and <sup>13</sup>C NMR spectra for Biphenyls:

#### **Biphenyl:**

Eluent: Petroleum ether; white crystals,  
m.p. 68-71 °C.

#### **4-Nitrobiphenyl:**

Eluent: 98:2 Petroleum ether /EtOAc; pale yellow crystals,  
m.p. 114 °C.

#### **4-Methylbiphenyl:**

Eluent: Petroleum ether; white crystals,  
m.p. 45-47 °C.

#### **4-Methoxybiphenyl:**

Eluent: Petroleum ether; white crystals,  
m.p. 88-90 °C.

#### **Biphenyl-4-carbaldehyde:**

Eluent: Petroleum ether; off-white crystals,  
m.p. 56-59 °C.

## Biphenyl

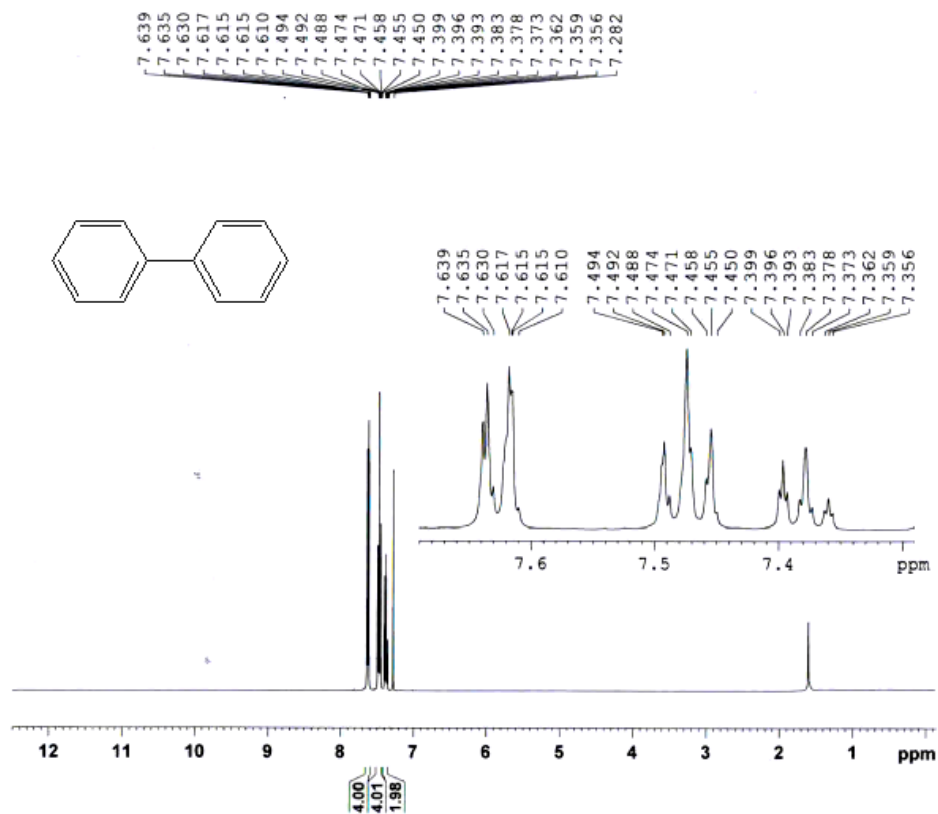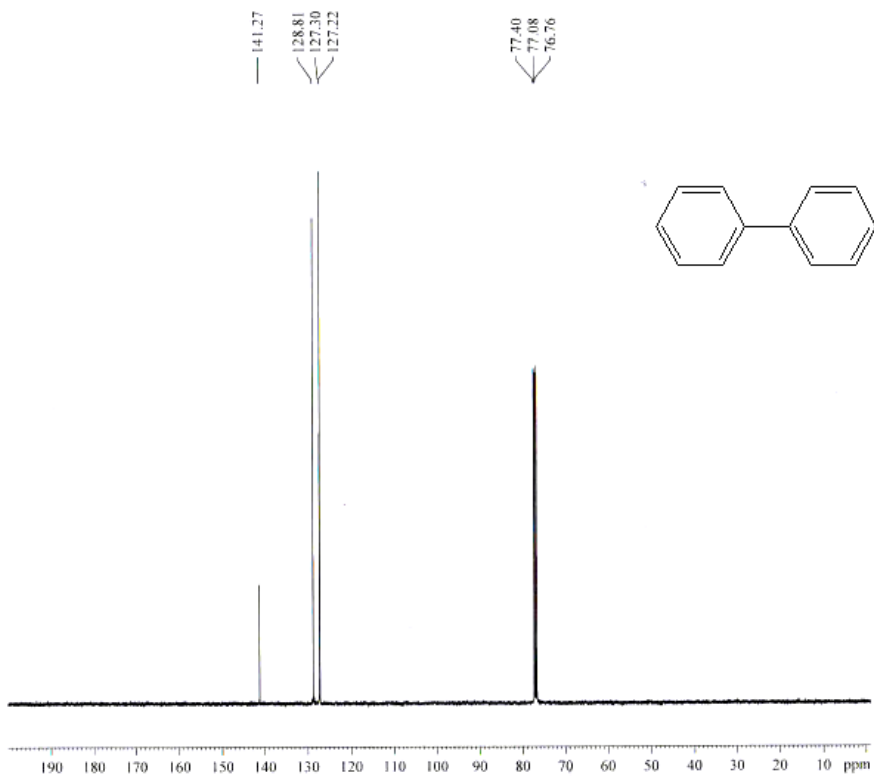

## 4-Nitrophenyl

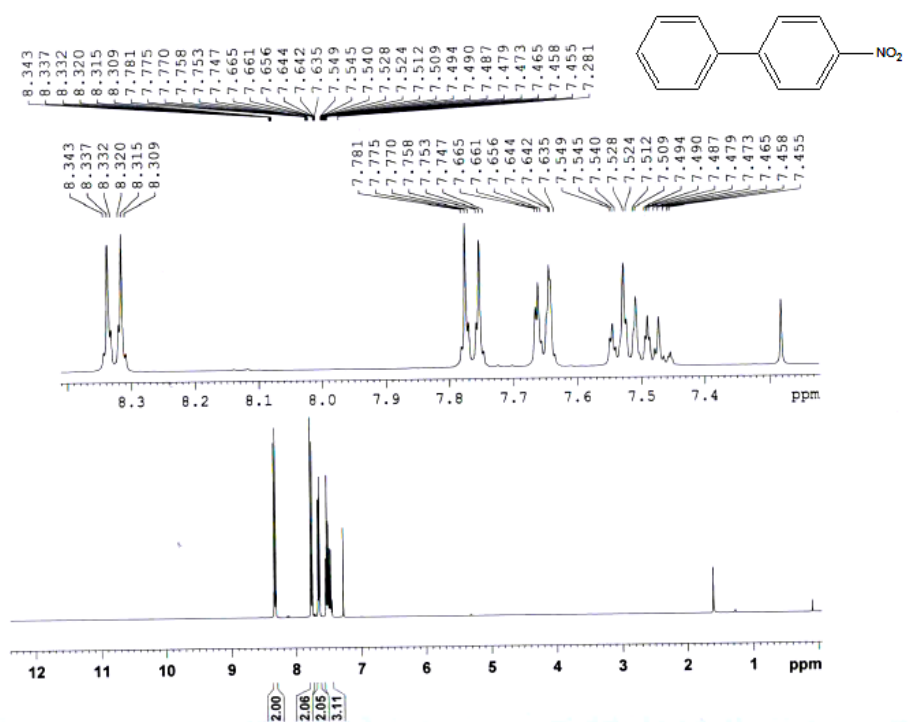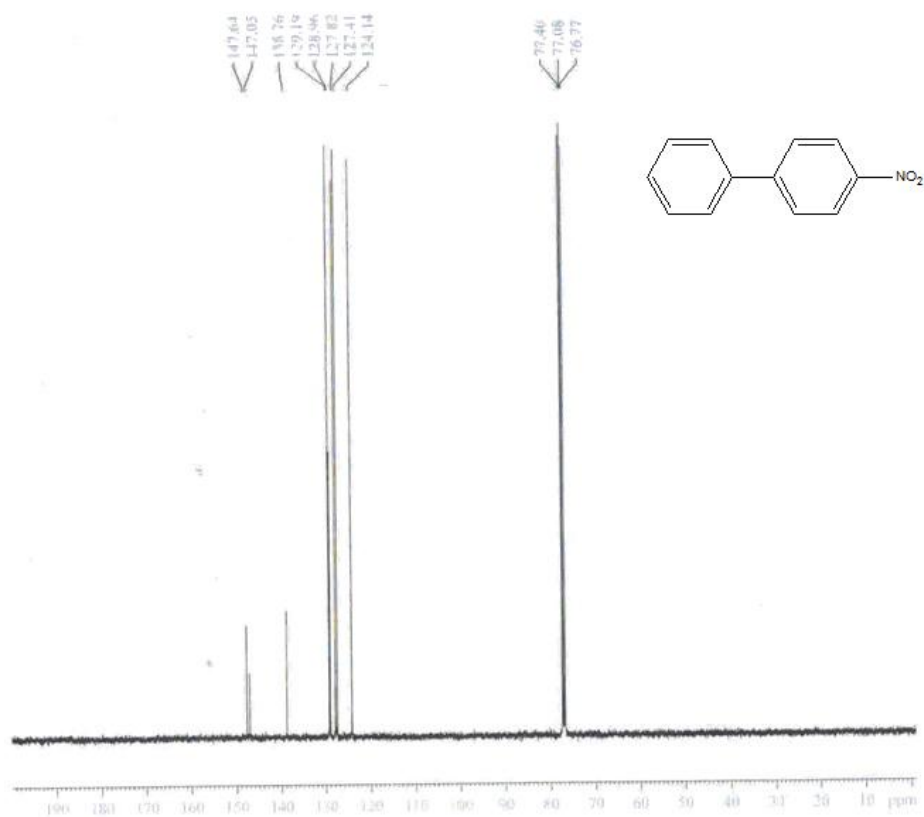

## 4- Methylbiphenyl

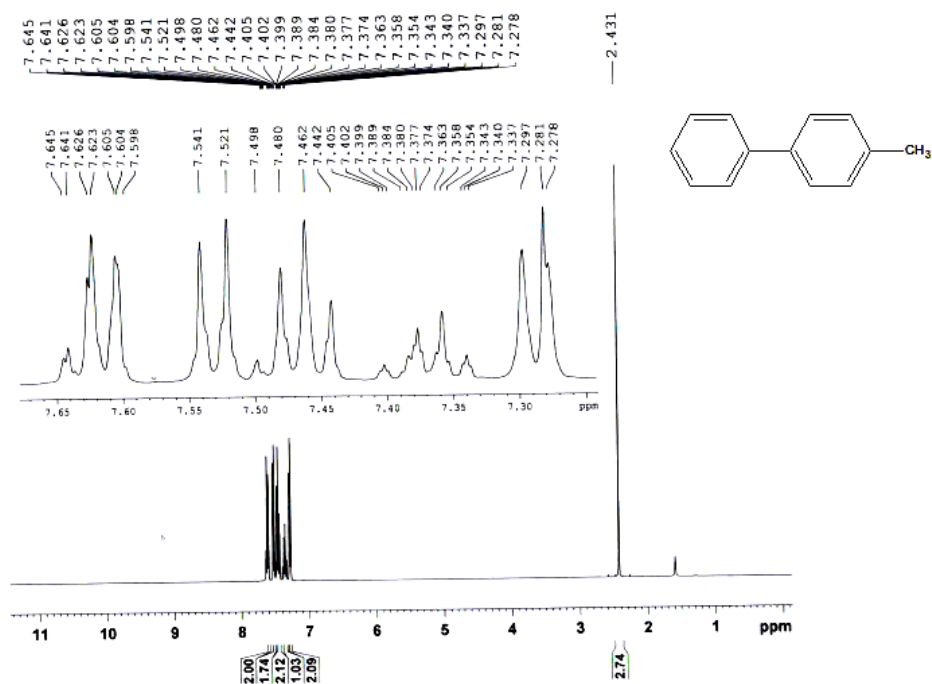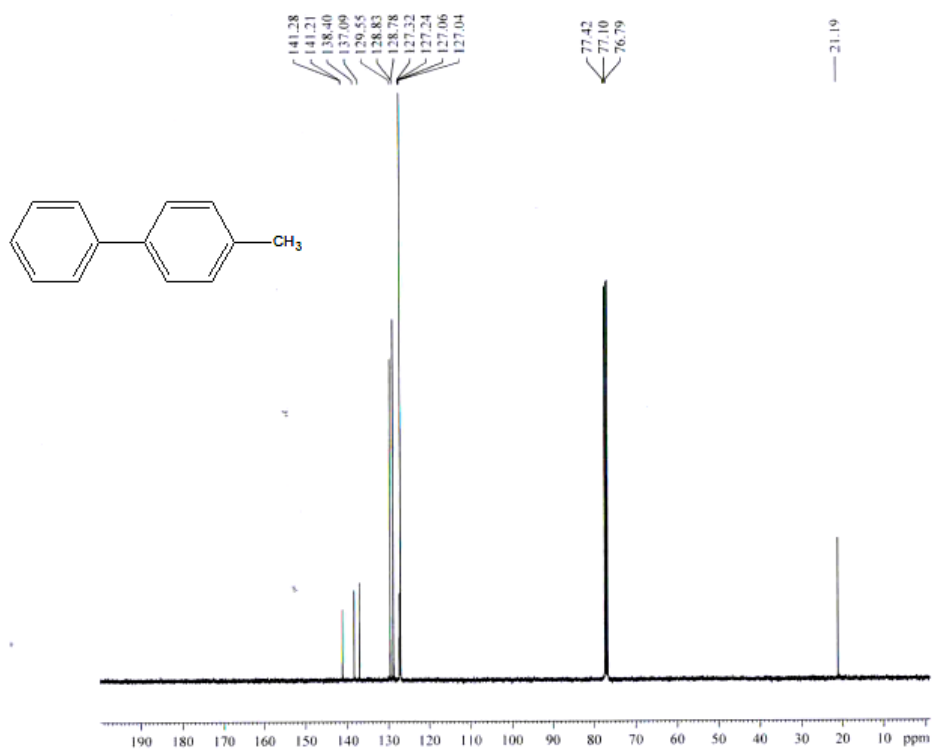

## 4- Methoxybiphenyl

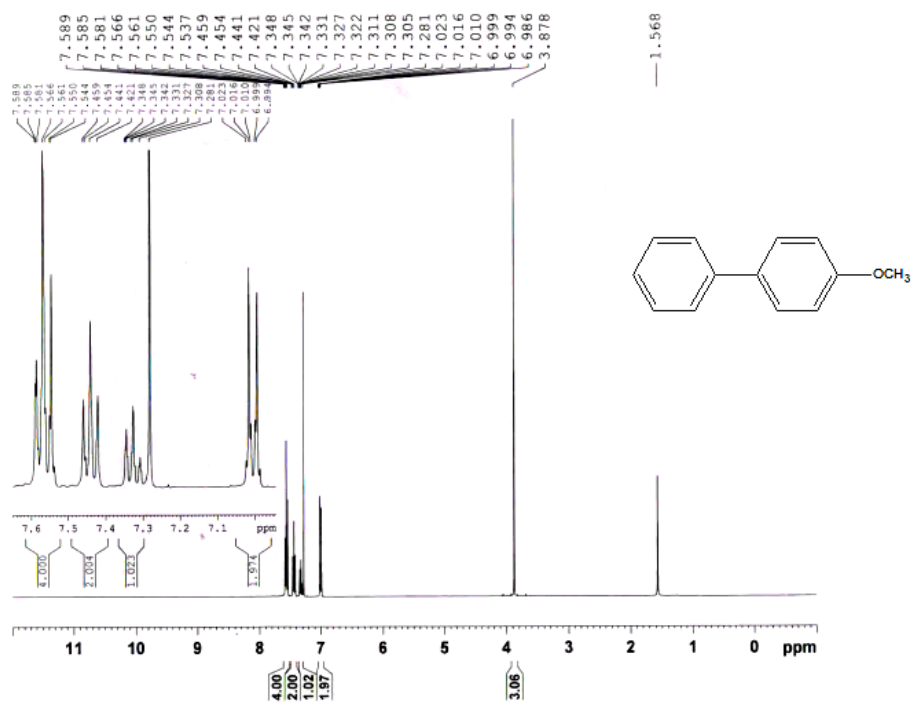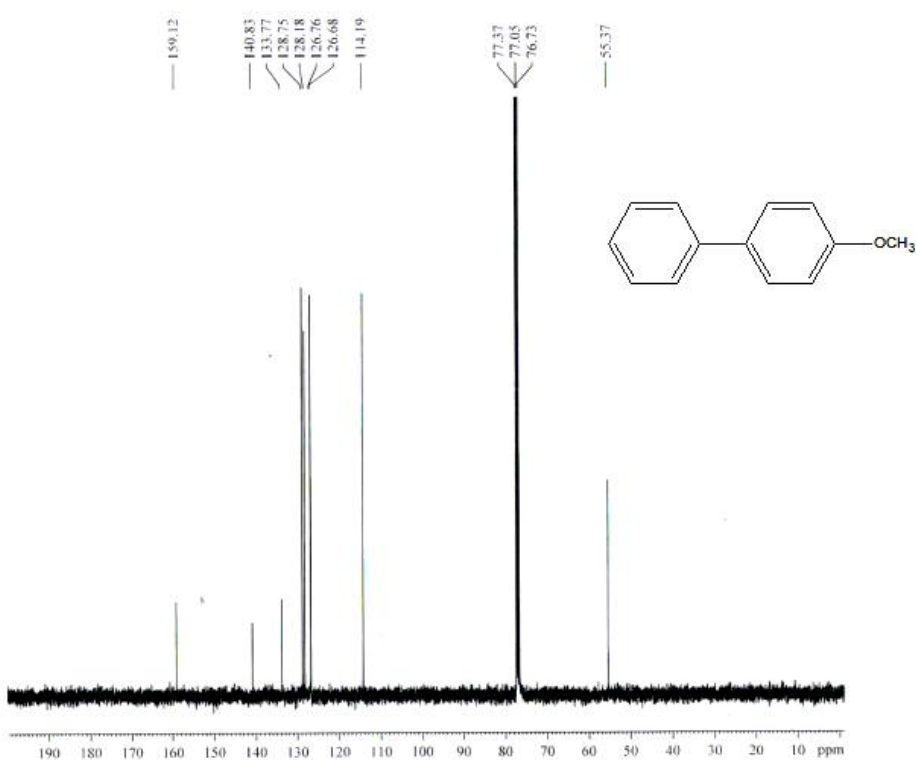

## Biphenyl-4-carbaldehyde

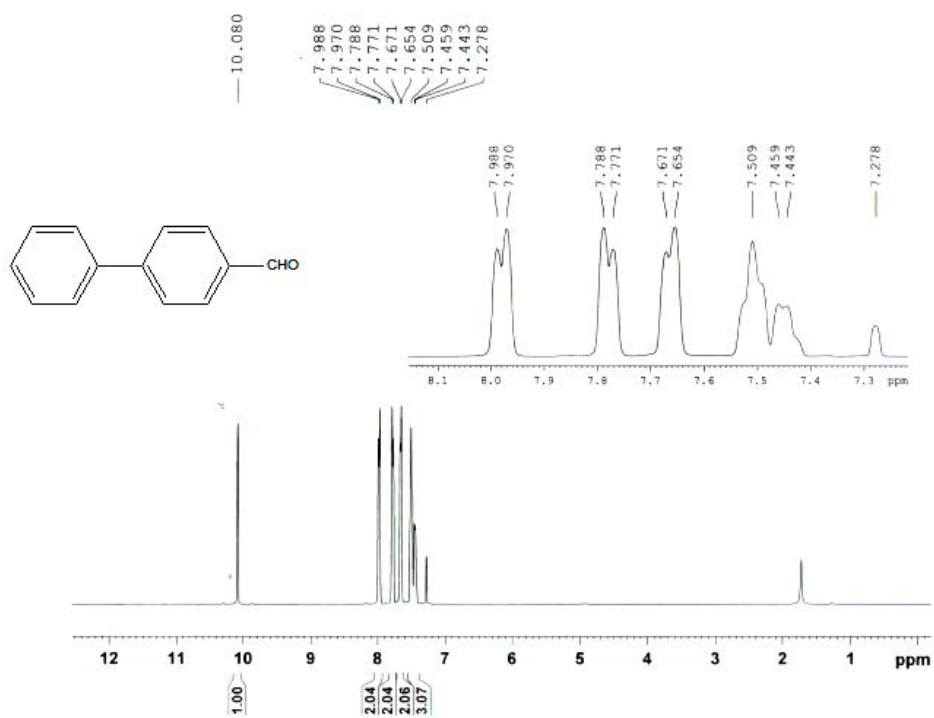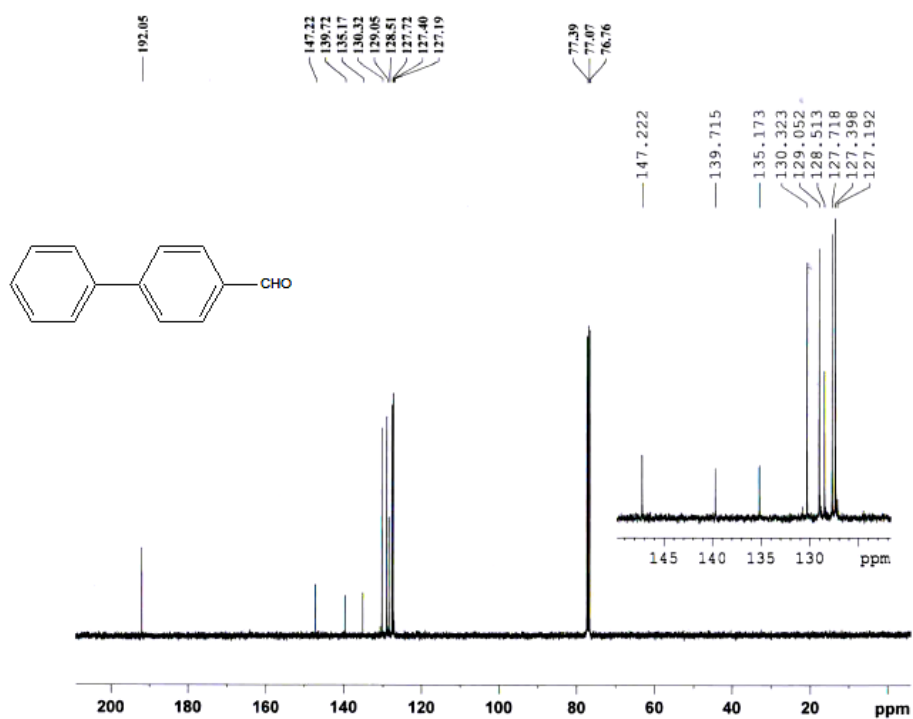

Supplement: c3dt51119g.pdf [file c3dt51119g.pdf]
